# Supplementary material for: Mitoribosomal defects aggravate liver cancer via aberrant glycolytic flux and T cell exhaustion
Source: HighWire-hosted journal article supplement (doi:10.1136/jitc-2021-004337), 2022-05-01
Supplement: jitc-2021-004337supp001_data_supplement.xlsx [file jitc-2021-004337supp001_data_supplement.xlsx]

## Sheet: Sheet1
Supplementary Table 2. Clinical characteristics of the patients with HCC
Tissue No.	Age	Sex	BMI	TNM staging	Etiology of HCC	AFP (ng/mL)	AST (IU/L)	ALT (IU/L)	Albumin (g/dL)	Total bilirubin (mg/dL)	Platelet x 103/mm3
1	50	M	21.2	I	HBV	55.8	48	32	3.1	1.6	132
2	47	F	27.2	I	HBV	102.5	50	29	2.9	1.6	158
3	55	M	18.1	I	HBV	38.2	66	48	2.8	1.5	169
4	51	F	23.8	I	HBV	41.5	74	55	3.5	1.4	112
5	64	M	21.6	I	Alcohol	112	56	38	2.6	1.1	132
6	48	M	25.2	I	HBV	38.8	26	24	3.8	0.8	130
7	61	F	20.8	I	HCV	42.6	30	38	4	1.3	125
8	60	M	22.6	I	HBV	55.2	102	68	3.6	1.8	108
9	85	M	20.1	I	HBV	68.3	80	66	2.7	2	136
10	53	M	24.2	I	Alcohol	50.6	88	72	3.2	2.1	105
11	68	M	22.7	I	Alcohol	74.3	43	40	3	1.5	102
12	68	M	21.3	I	HBV	66.3	66	58	3.8	1.5	204
13	52	M	23	I	HBV	55.2	55	38	4.2	1.6	220
14	49	M	25.1	I	HBV	90.8	28	22	3.2	1.5	212
15	56	F	24.8	I	HBV	88.3	48	44	4.2	2	185
16	61	F	23.5	I	HCV	88.5	92	88	4	2.2	175
17	49	M	22.5	I	HBV	124.6	106	124	4.1	1.8	155
18	70	M	24.8	I	HCV	108.2	102	83	3.8	1.9	106
19	56	M	20.6	I	HBV	200.6	113	89	3.5	1.9	110
20	67	F	19.8	I	HBV	88.3	44	41	2.8	1.5	140
21	59	F	21.8	I	HBV	92.1	38	33	2.6	2.2	135
22	62	M	24	I	HCV	58.4	25	28	3.1	2.1	125
23	61	M	25.1	I	HBV	100.6	62	38	3.6	1.5	116
24	73	M	23.3	I	Alcohol	224.8	69	84	3.4	2.5	108
25	74	M	24.5	I	HBV	60.8	44	48	3.2	2.3	98
26	60	M	26.2	II	HCV	66.9	42	56	3.5	1.5	128
27	57	M	20.5	II	Alcohol	100.8	112	102	2.6	2.2	106
28	55	M	21.2	II	HBV	124.2	68	54	2.8	1.7	124
29	62	F	21.6	II	HBV	130.5	51	55	2.9	1.9	106
30	67	M	23.3	II	HCV	69.2	84	80	3.2	2.4	212
31	55	M	22.4	II	Alcohol	58.4	27	25	3	1.8	168
32	49	M	25.1	II	HBV	100.7	42	40	3.8	2.6	166
33	52	F	23.4	II	HBV	250.6	127	103	4	2.4	157
34	68	M	22.8	II	Alcohol	330.6	108	144	3.8	2.8	130
35	72	M	22.1	II	HBV	202.6	94	92	3.5	2.6	110
36	70	F	23.3	II	HBV	100.8	128	122	3.5	2.8	90
37	56	M	22.2	II	HCV	90.6	102	118	3.3	3	92
38	64	F	23.4	III	HBV	180.3	44	48	3.8	1.5	83
39	62	M	23	III	HBV	220.5	41	38	4	1.8	78
40	50	M	20.5	III	Alcohol	208.6	86	82	2.6	2.1	106
41	70	M	20.9	III	HBV	1024.6	158	110	2.8	1.9	118
42	75	M	20.8	III	HBV	455.8	68	80	2.9	2	100
43	69	M	22.6	III	Alcohol	420.3	82	80	3.1	2.2	88
44	61	F	23.6	III	HBV	302.9	94	81	3.3	1.6	162
45	56	M	21.7	III	HCV	824.2	205	227	2.5	2.9	101
46	53	F	21.1	III	HBV	198.6	103	82	2.6	2.5	116
47	52	M	20.6	III	HBV	204.4	76	88	2.6	2.4	82
48	58	M	22.9	III	HCV	220.6	68	69	3.1	3	88
49	64	M	23.5	III	Alcohol	642.5	55	52	2.6	1.5	105
50	73	M	24.2	III	HBV	705.2	180	202	2.9	1.6	93
BMI, body mass index; AFP, alpha fetoprotein; AST, aspartate transaminase; alanine transaminase.
