# Supplementary material for: Mitoribosomal defects aggravate liver cancer via aberrant glycolytic flux and T cell exhaustion
Source: HighWire-hosted journal article supplement (doi:10.1136/jitc-2021-004337), 2022-05-01
Supplement: jitc-2021-004337supp005_data_supplement.xlsx [file jitc-2021-004337supp005_data_supplement.xlsx]

## Sheet: Crif1_mutation_in_human
Supplementary Table 1. Mutations of CRIF1 in the patients with HCC
Mutation ID	Donor ID	Genomic DNA Change	Type	Consequences type	Age	Stage	Survival (days)	Projects Mutation Observed
MU77091997	DO45287	chr19:g.13069829A>-	deletion of <=200bp	upstream	74	1	390	LIRI-JP:1/258
MU32139607	DO50850	chr19:g.13072611G>T	single base substitution	upstream	74	3	720	LIRI-JP:1/258
MU31602776	DO50807	chr19:g.13067576G>A	single base substitution	intron	67	1	540	LIRI-JP:1/258
MU29269258	DO50787	chr19:g.13067297G>A	single base substitution	intron	63	3	480	LIRI-JP:1/258
MU3288228	DO45237	chr19:g.13067153A>G	single base substitution	intron	58	2	900	LIRI-JP:1/258
MU79072913	DO45207	chr19:g.13067997G>A	single base substitution	synonymous	68	1	1050	LIRI-JP:1/258
MU3030861	DO45145	chr19:g.13067548G>A	single base substitution	intron	78	3	60	LIRI-JP:1/258
MU30994303	DO50802	chr19:g.13064545G>T	single base substitution	downstream	49	2	930	LIRI-JP:1/258
MU3288232	DO45237	chr19:g.13066959A>C	single base substitution	intron	58	2	900	LIRI-JP:1/258
MU3145999	DO45171	chr19:g.13065878A>C	single base substitution	intron	56	3	600	LIRI-JP:1/258
MU77435503	DO23538	chr19:g.13070645A>G	single base substitution	upstream	67	2	450	LIRI-JP:1/258
MU79526554	DO45299	chr19:g.13072484C>A	single base substitution	upstream	70	1	1440	LIRI-JP:1/258
MU77494496	DO45299	chr19:g.13071878->T	insertion of <=200bp	upstream	70	1	1440	LIRI-JP:1/258
MU77172083	DO48682	chr19:g.13066340C>-	deletion of <=200bp	intron	72	3	120	LIRI-JP:1/258
MU3599543	DO23538	chr19:g.13061895A>G	single base substitution	downstream	67	2	450	LIRI-JP:1/258
MU3788097	DO45299	chr19:g.13072951G>T	single base substitution	upstream	70	1	1440	LIRI-JP:1/258
MU30532588	DO50798	chr19:g.13070593T>A	single base substitution	upstream	77	3	30	LIRI-JP:1/258
